# Supplementary material
Source: PubMed Central journal article supplement (PMC3199286)
Supplement: NIHMS319037-supplement-1_si_001.pdf [file NIHMS319037-supplement-1_si_001.pdf]

**Supporting Information for:**

**Activity-Based Protein Profiling of Protein Arginine Methyltransferase 1<sup>†</sup>**

Obiamaka Obianyo<sup>1,2</sup>, Corey P. Causey<sup>2</sup>, Justin E. Jones<sup>1</sup>, and Paul R. Thompson<sup>1\*</sup>

<sup>1</sup>Department of Chemistry, The Scripps Research Institute, 130 Scripps Way, Jupiter, FL 33458

<sup>2</sup>Department of Chemistry and Biochemistry, University of South Carolina, 631 Sumter St,  
Columbia, SC 29208

Running Title: ABPPs targeting PRMT1

---

<sup>†</sup> This work was supported in part by the University Of South Carolina Research Foundation (P.R.T), The Scripps Research Institute, and, in part, by NIH grant GM079357 to PRT.

\* To whom correspondence should be addressed: Department of Chemistry, The Scripps Research Institute, 130 Scripps Way, Jupiter, Fl, 33458 tel: (561)-228-2860; fax: (561)-228-2918; e-mail: [Pthompso@scripps.edu](mailto:Pthompso@scripps.edu).

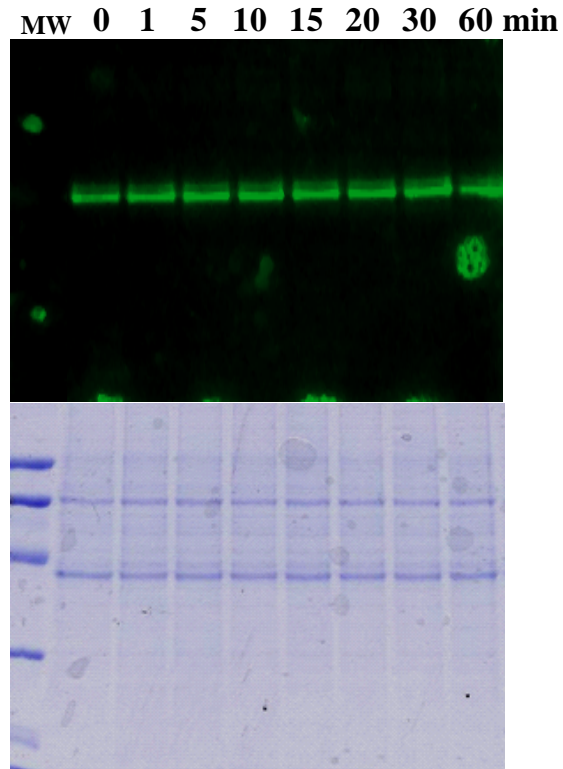

**Figure S1.** *Stability of PRMT1-F-C21 complex.* Recombinant PRMT1 (12  $\mu$ M) was pre-labeled with F-C21 (12  $\mu$ M) for 30 min at 37  $^{\circ}$ C. The labeled enzyme (2  $\mu$ M final) was then added to 100  $\mu$ g of MCF-7 whole cell extracts and incubated at 37  $^{\circ}$ C for the indicated times before being quenched with 6X SDS dye.
